# Supplementary material for: The social and structural architecture of the yeast protein interactome
Source: PubMed Central journal article supplement (PMC10700138; doi:10.1038/s41586-023-06739-5), 2023-11-15
Supplement: 41586_2023_6739_MOESM1_ESM.pdf [file 41586_2023_6739_MOESM1_ESM.pdf]

**Supplementary information**

---

**The social and structural architecture of the yeast protein interactome**

---

In the format provided by the authors and unedited

# Supplementary Figures

Michaelis et al.

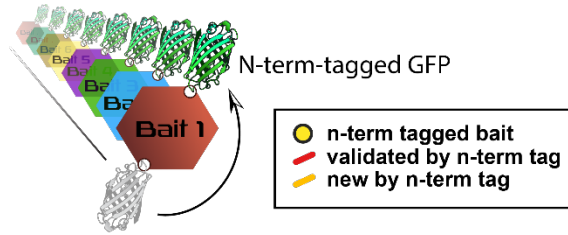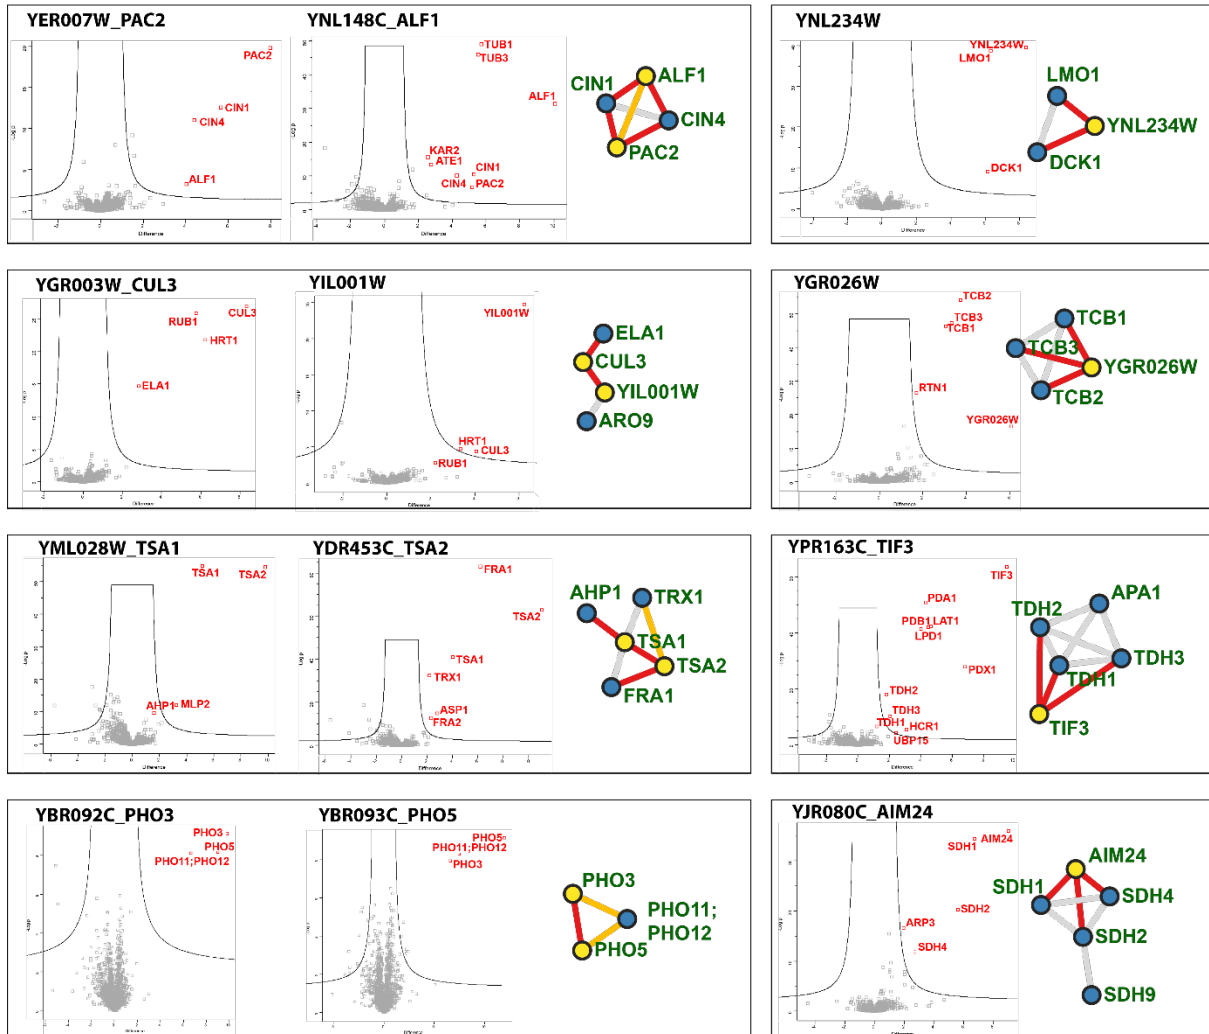

**Supplementary Information Figure 1 (part 1/2)** | Validation of selected clusters containing novel interactions or uncharacterized proteins using n-terminal GFP tagged baits. x-axis:  $\log_2(\text{foldchange})$ , y-axis:  $-\log_{10}(\text{p-value})$ ; FDR=0.01.

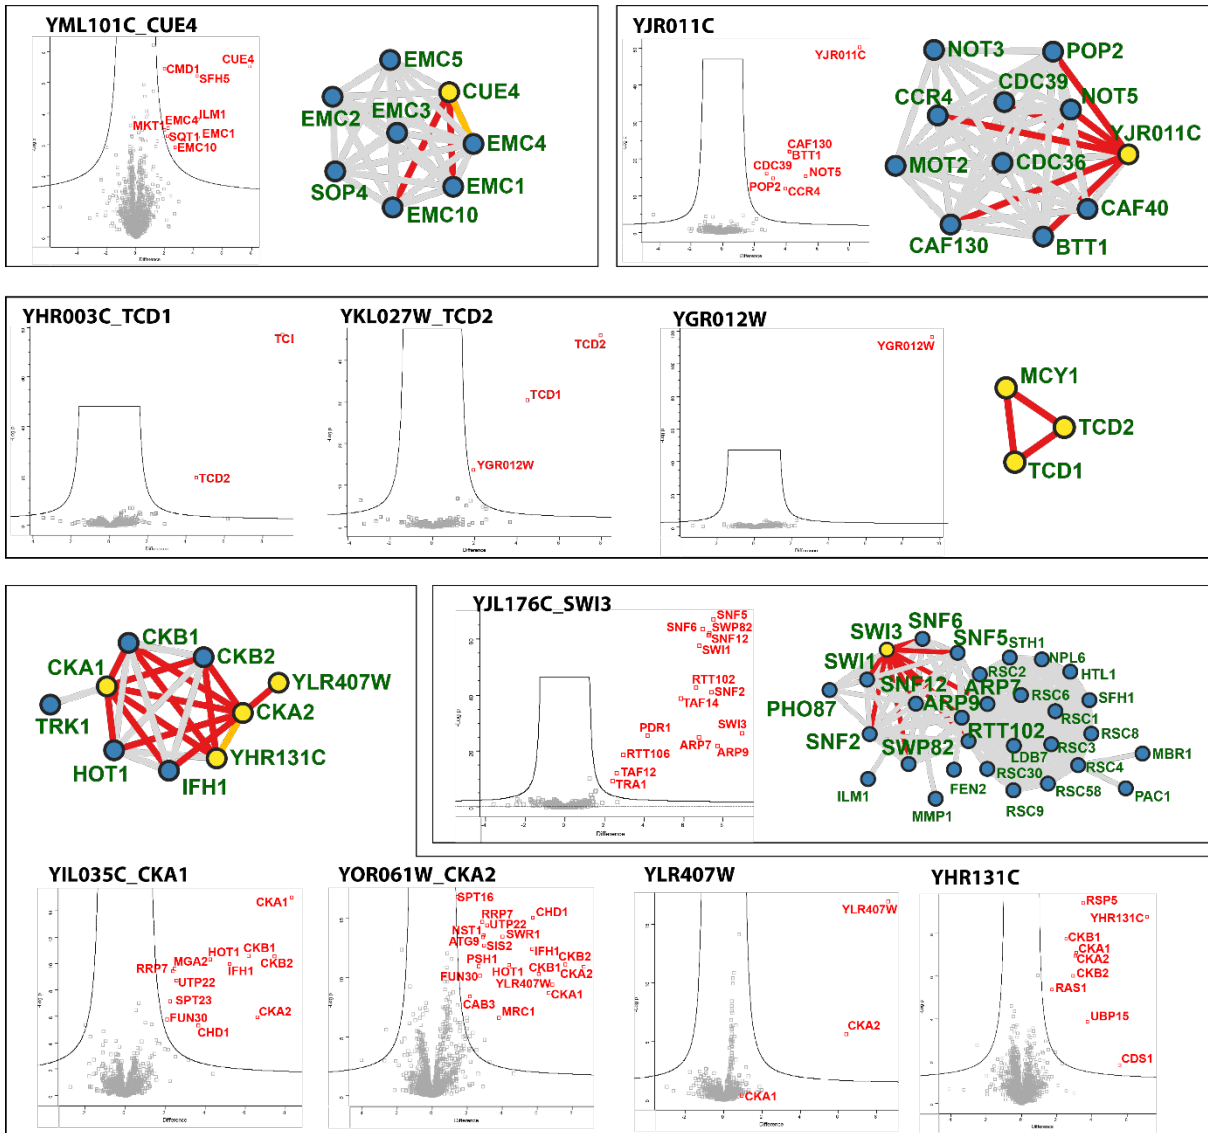

Supplementary Information Figure 1 (part 2/2) | Continuation of supplementary figure 1.

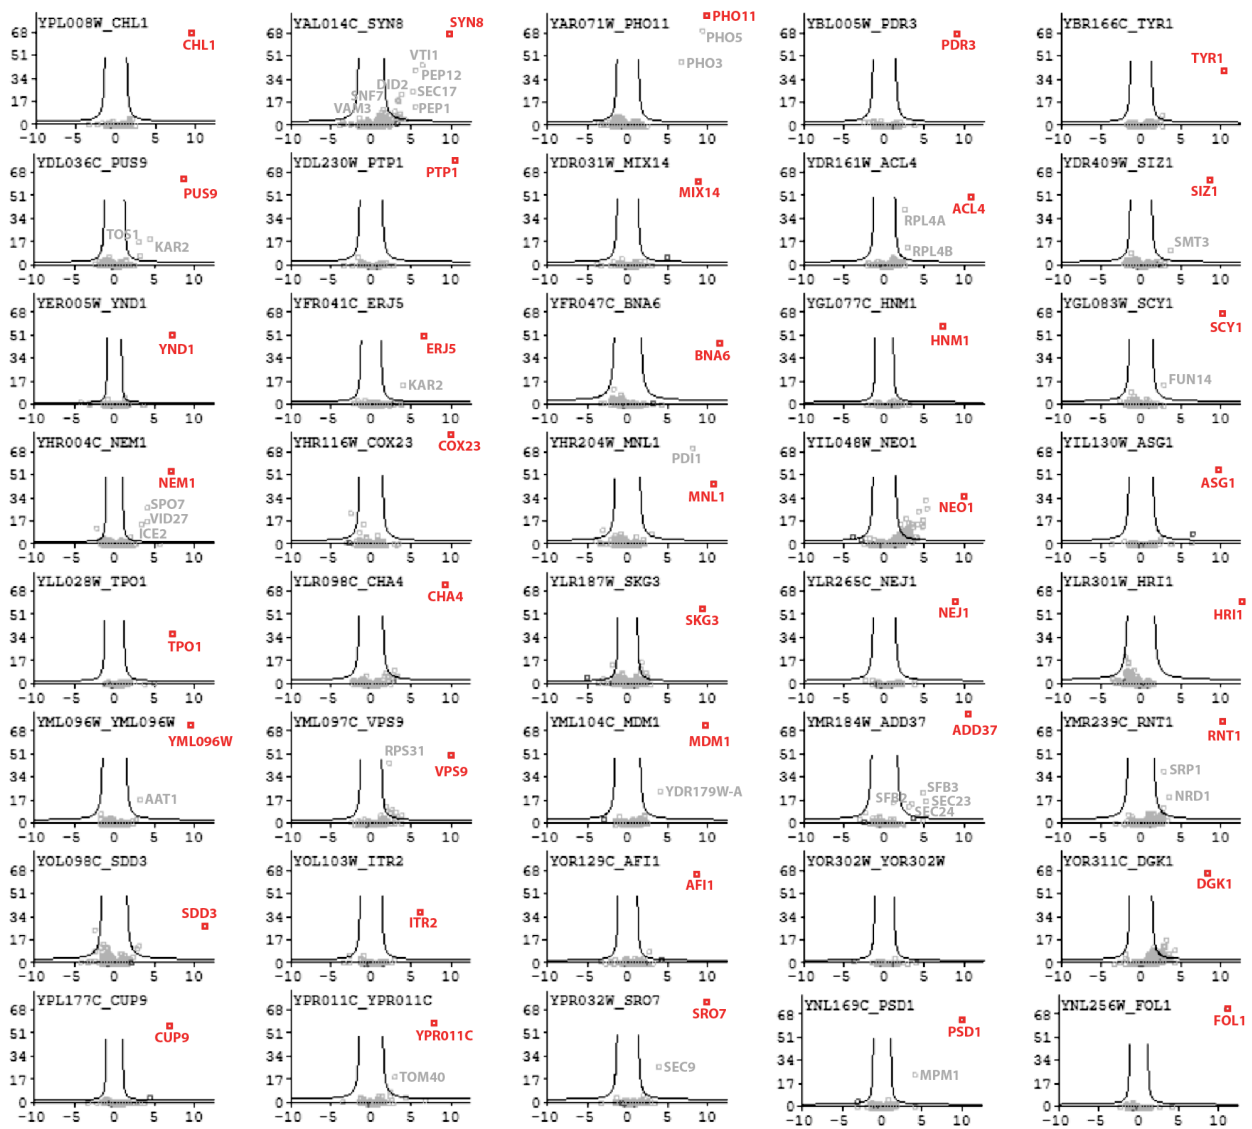

**Supplementary Information Figure 2 (part 1/2) |** Reciprocal pull-downs (N-terminal Nop1pr-GFP-tagged, Weill et al., 2018) of proteins without a significant interactor in C-terminally tagged main dataset (selection from Suppl. Fig. 5.). About half of the pull-downs identified significant interactors. Bait proteins samples proteins highlighted in red. x-axis:  $\log_2(\text{foldchange})$ , y-axis:  $-\log_{10}(\text{p-value})$ ; FDR=0.01.

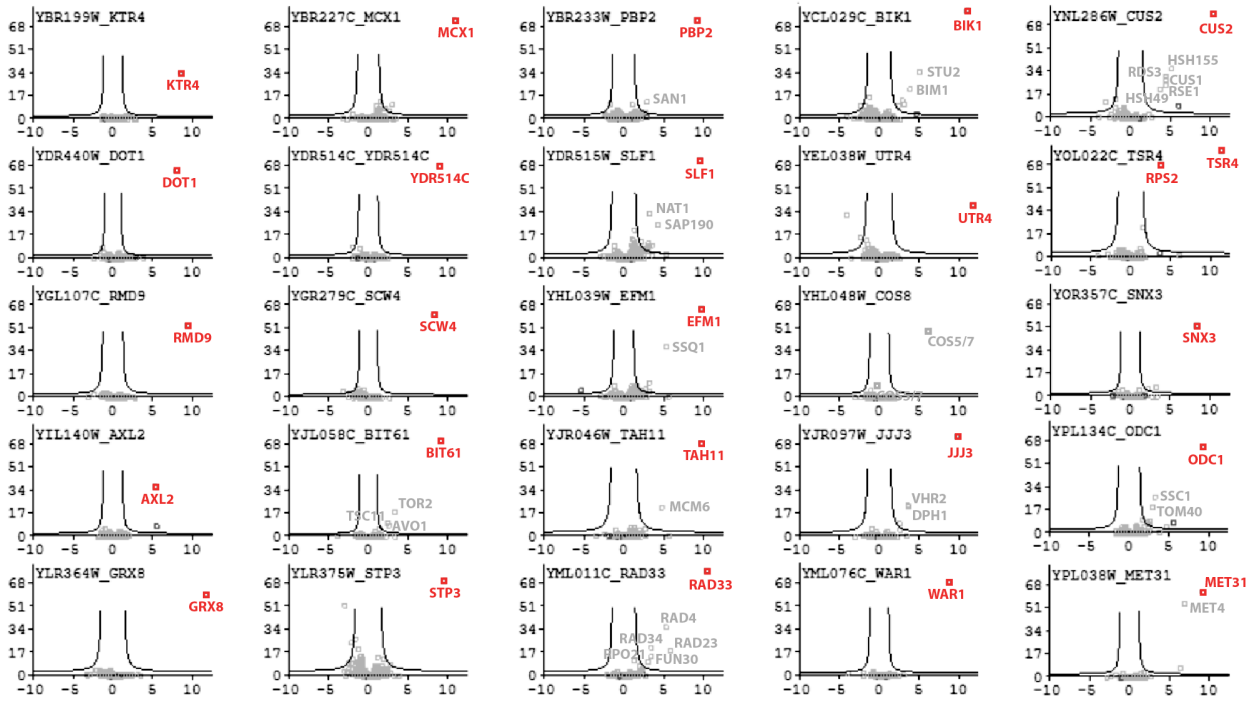

Supplementary Information Figure 2 (part 2/2) | Continuation of supplementary figure 2.

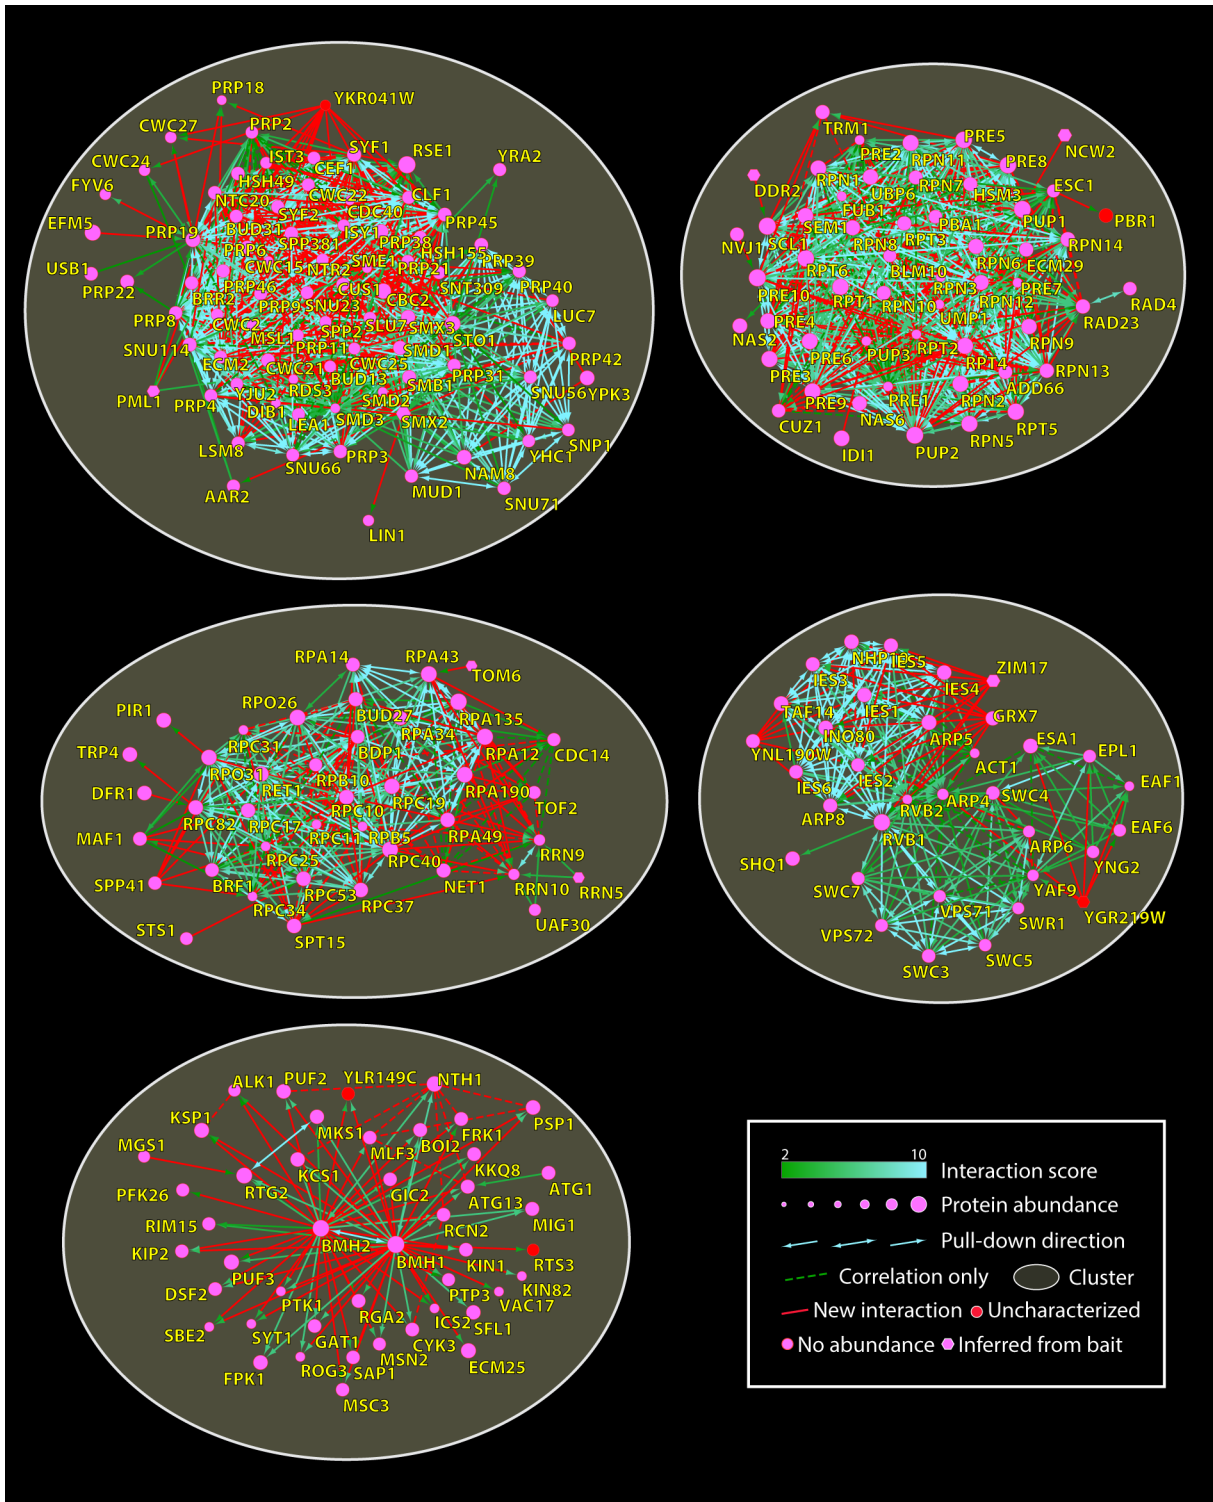

**Supplementary Information Figure 3 (part 1/6)** | Extended selection of clusters involving proteins with novel interactions and/or uncharacterized proteins supported by multiple layers of evidence.

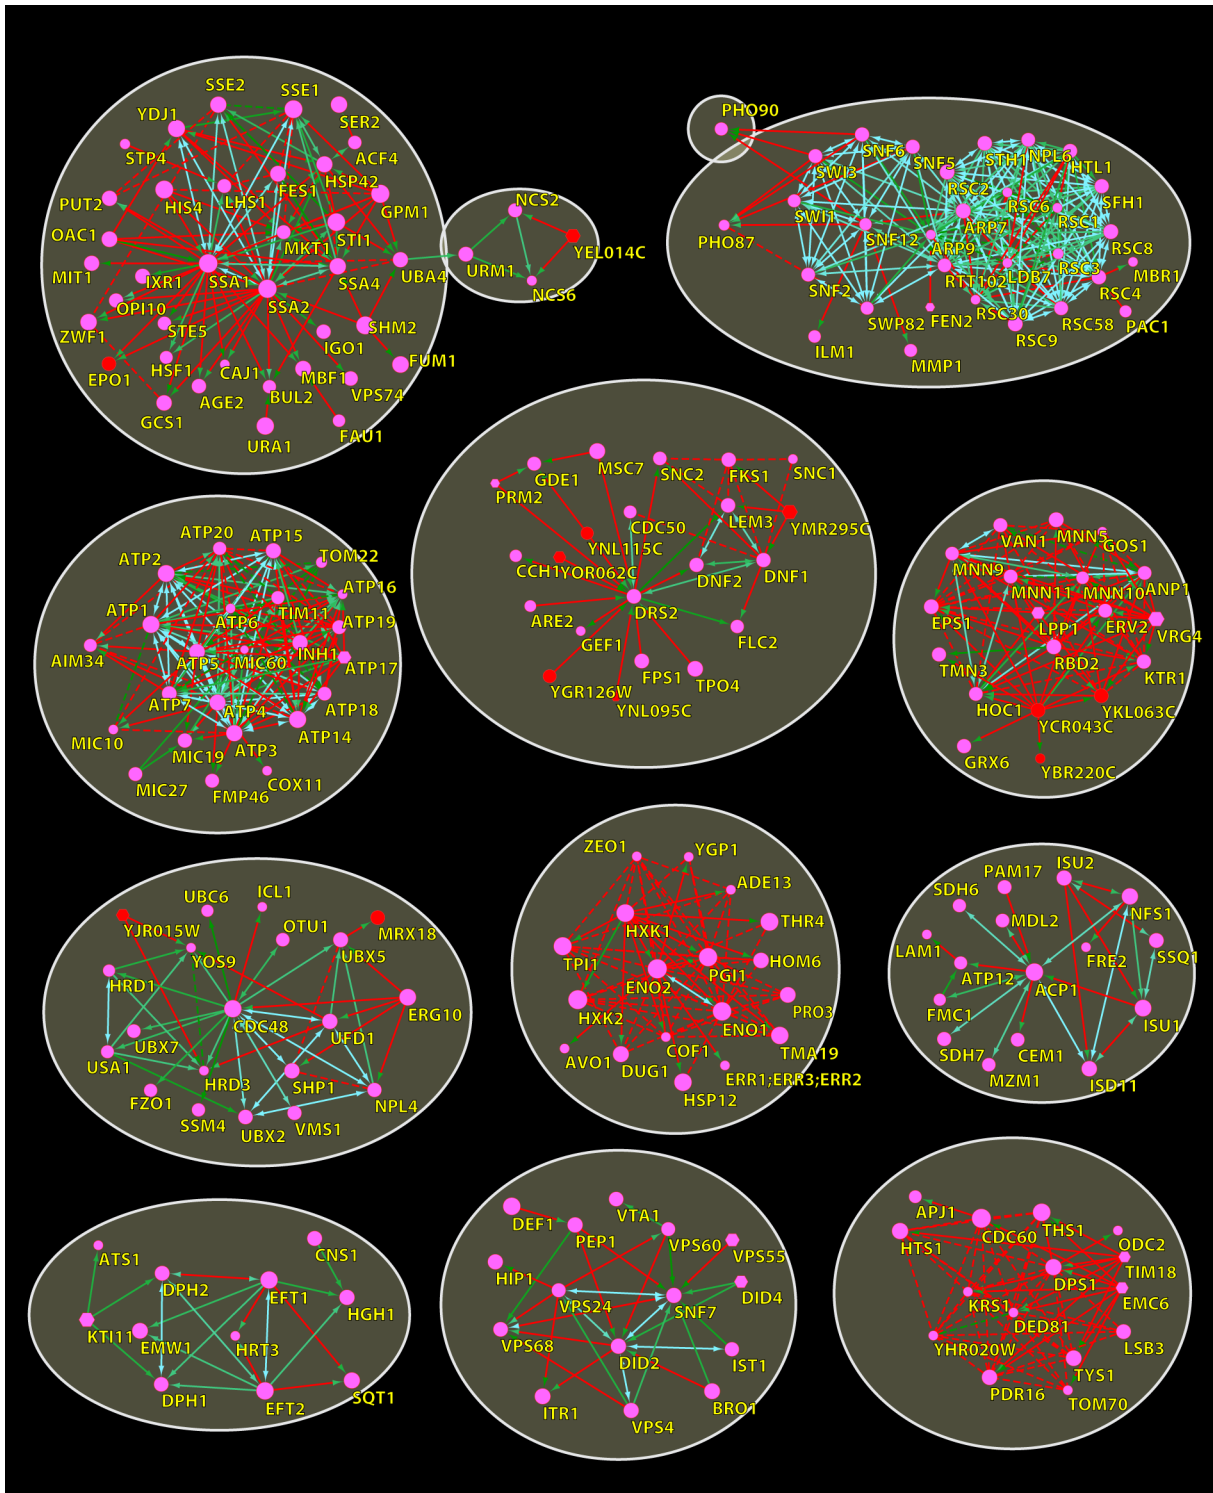

Supplementary Information Figure 3 (part 2/6) | Continuation of supplementary figure 3.

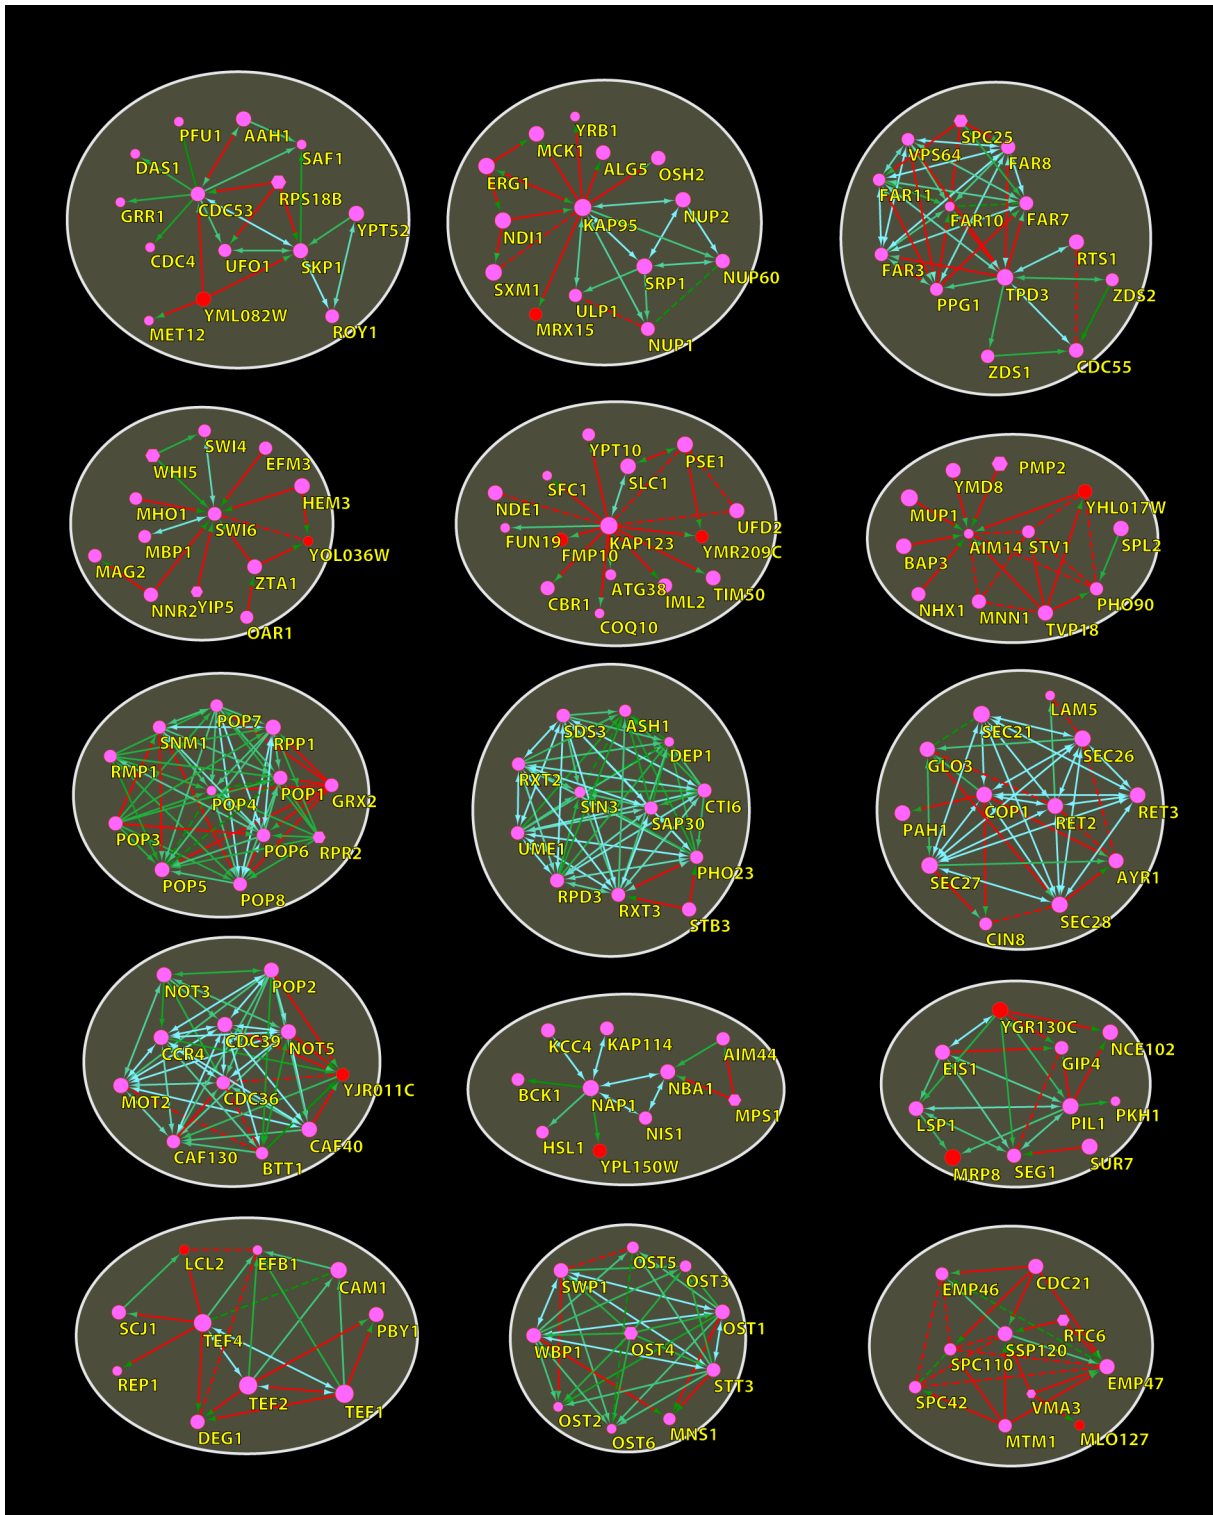

Supplementary Information Figure 3 (part 3/6) | Continuation of supplementary figure 3.



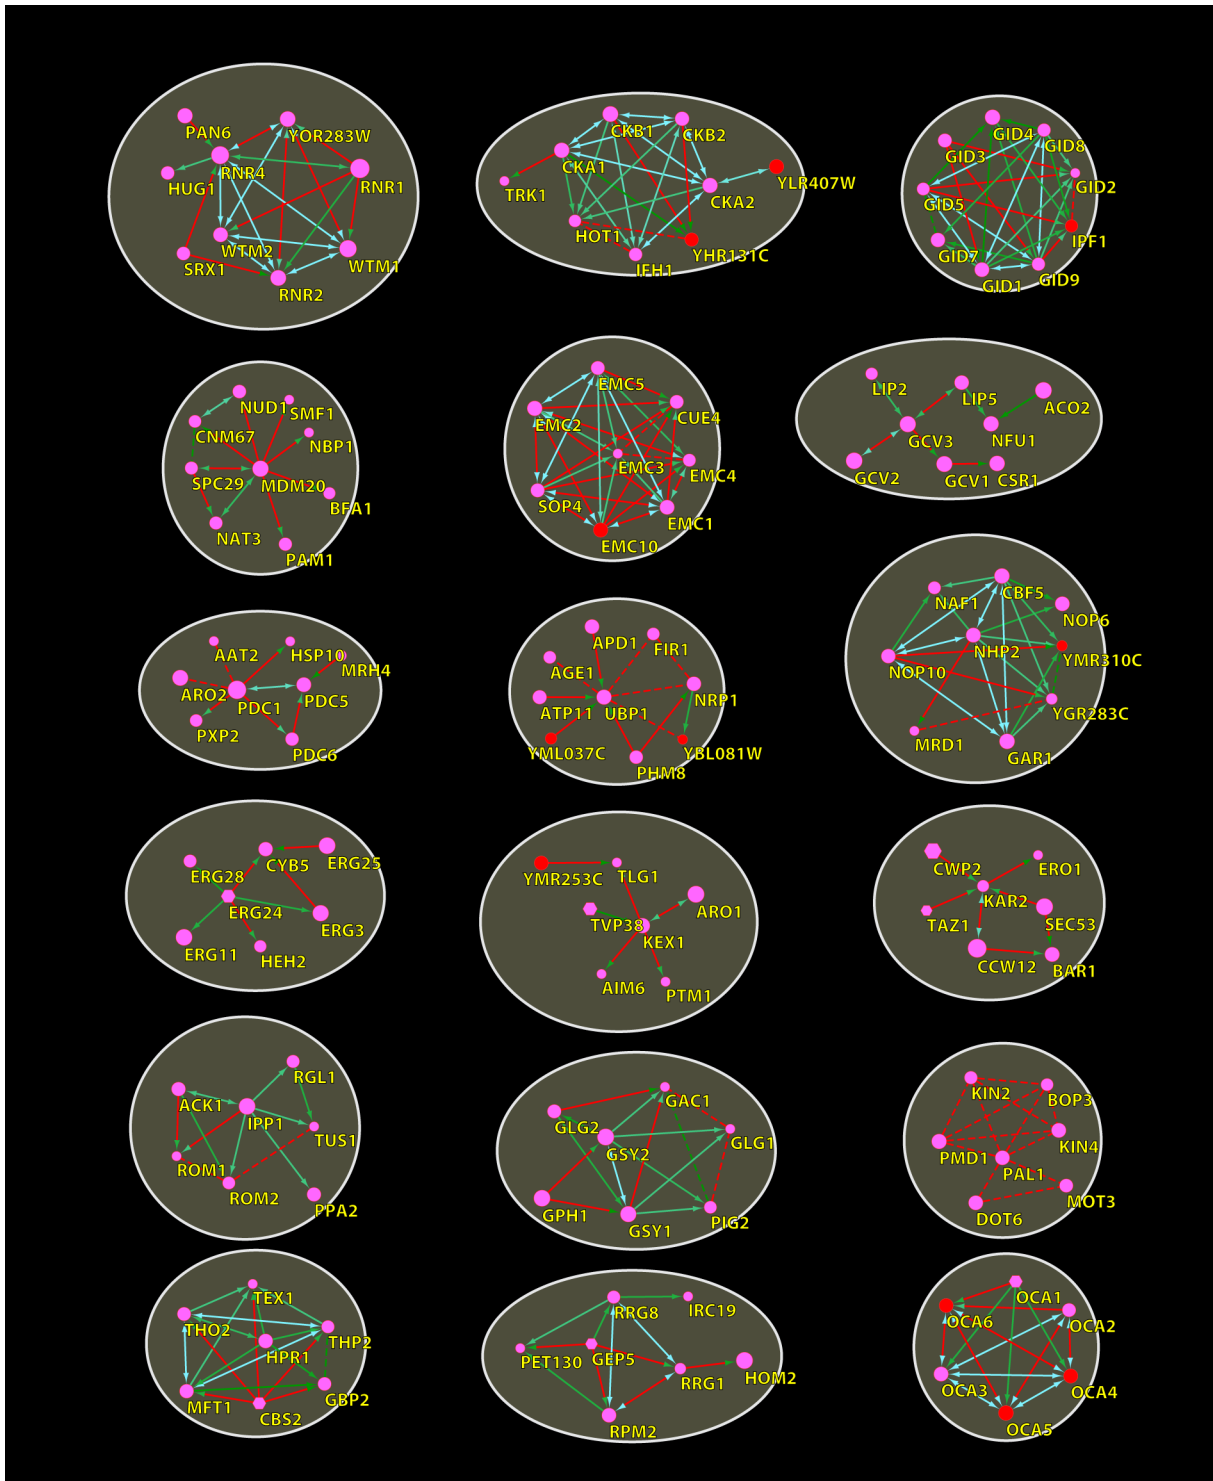

Supplementary Information Figure 3 (part 4/6) | Continuation of supplementary figure 3.

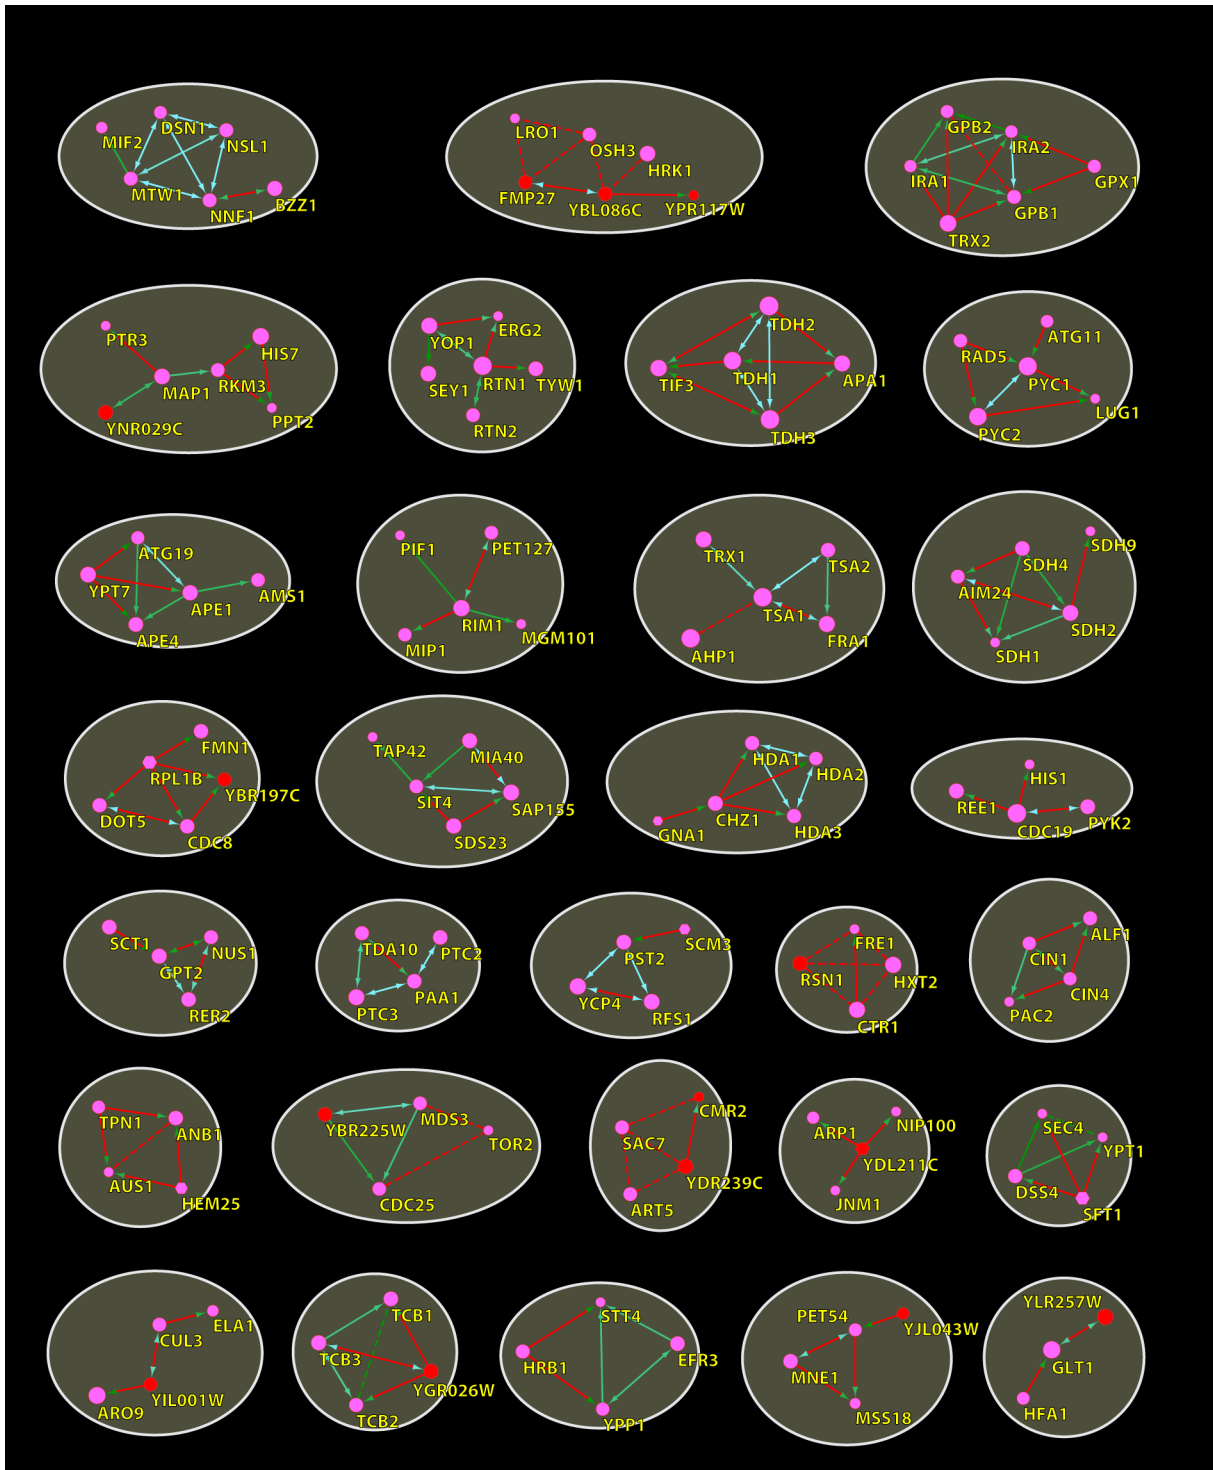

Supplementary Information Figure 3 (part 5/6) | Continuation of supplementary figure 3.

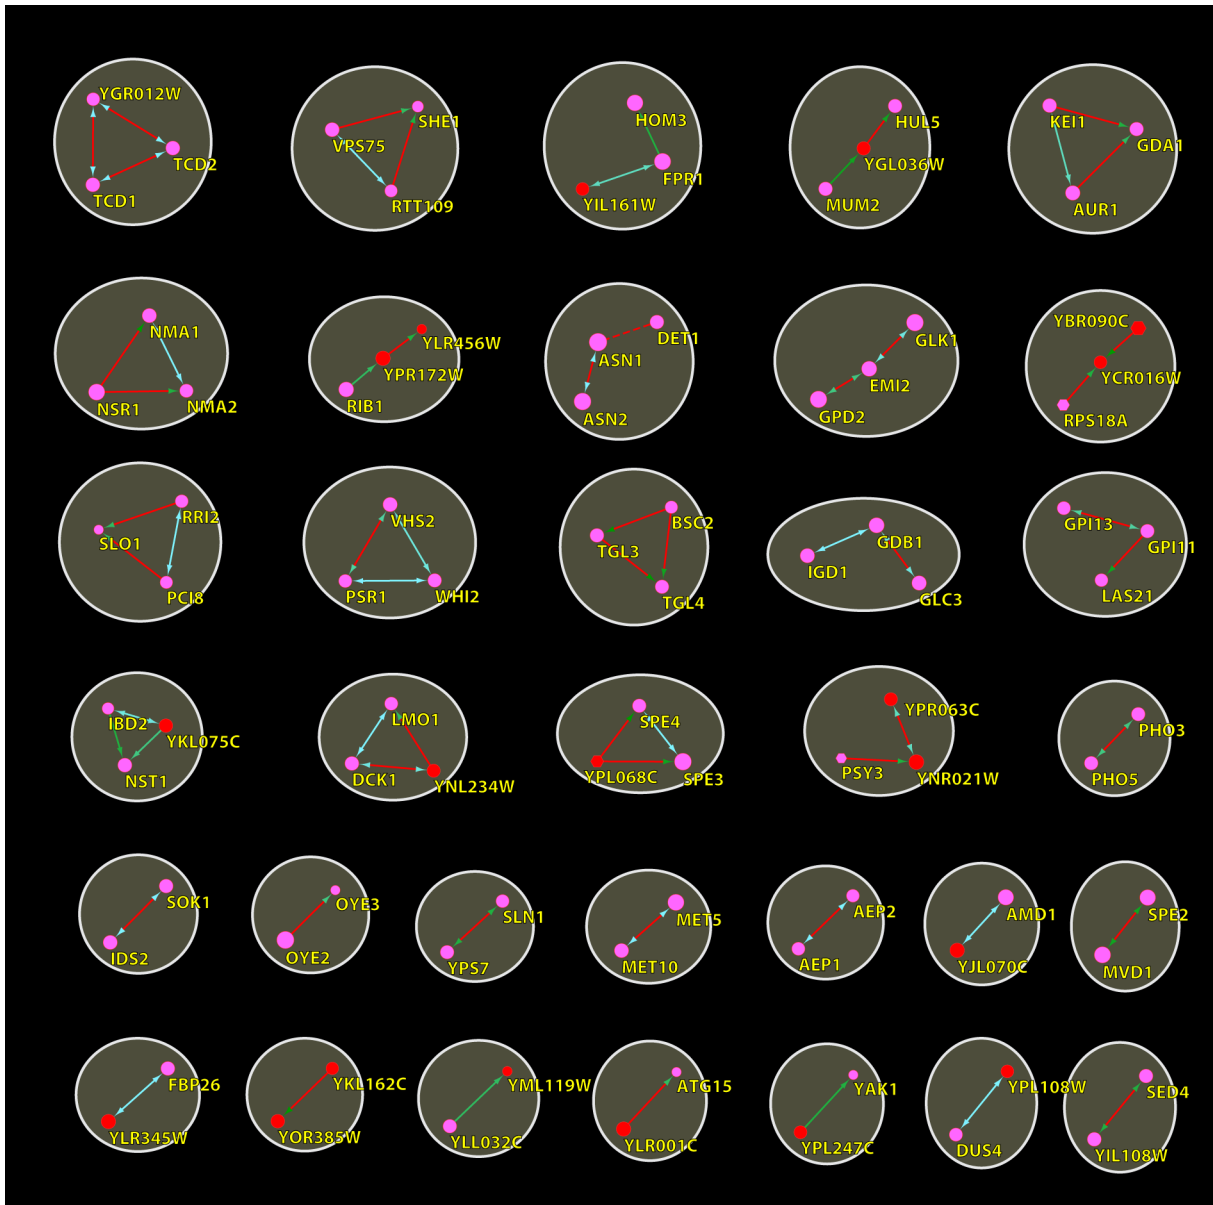

Supplementary Information Figure 3 (part 6/6) | Continuation of supplementary figure 3.

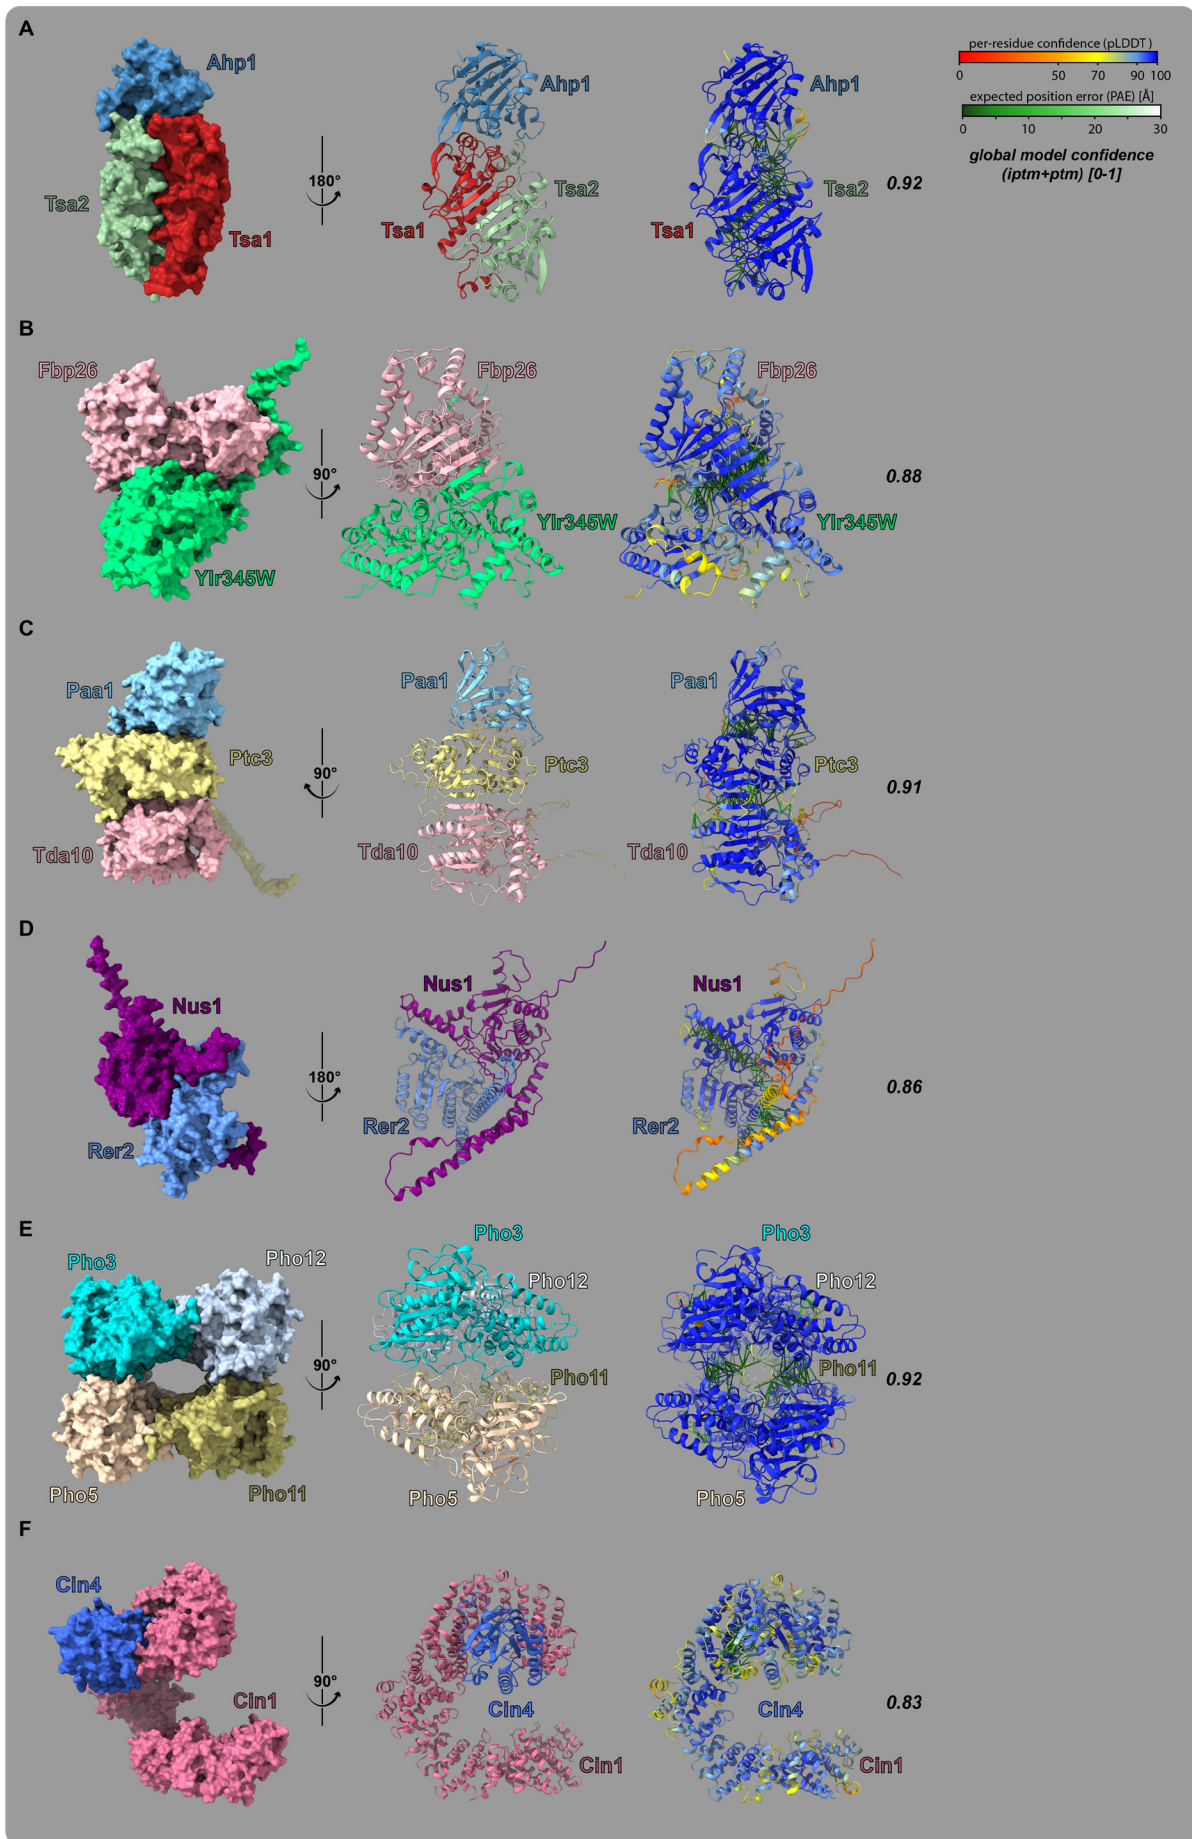

**Supplementary Information Figure 4 (part 1/4) | Clusters and subclusters involving proteins with novel interactions and/or uncharacterized proteins.**

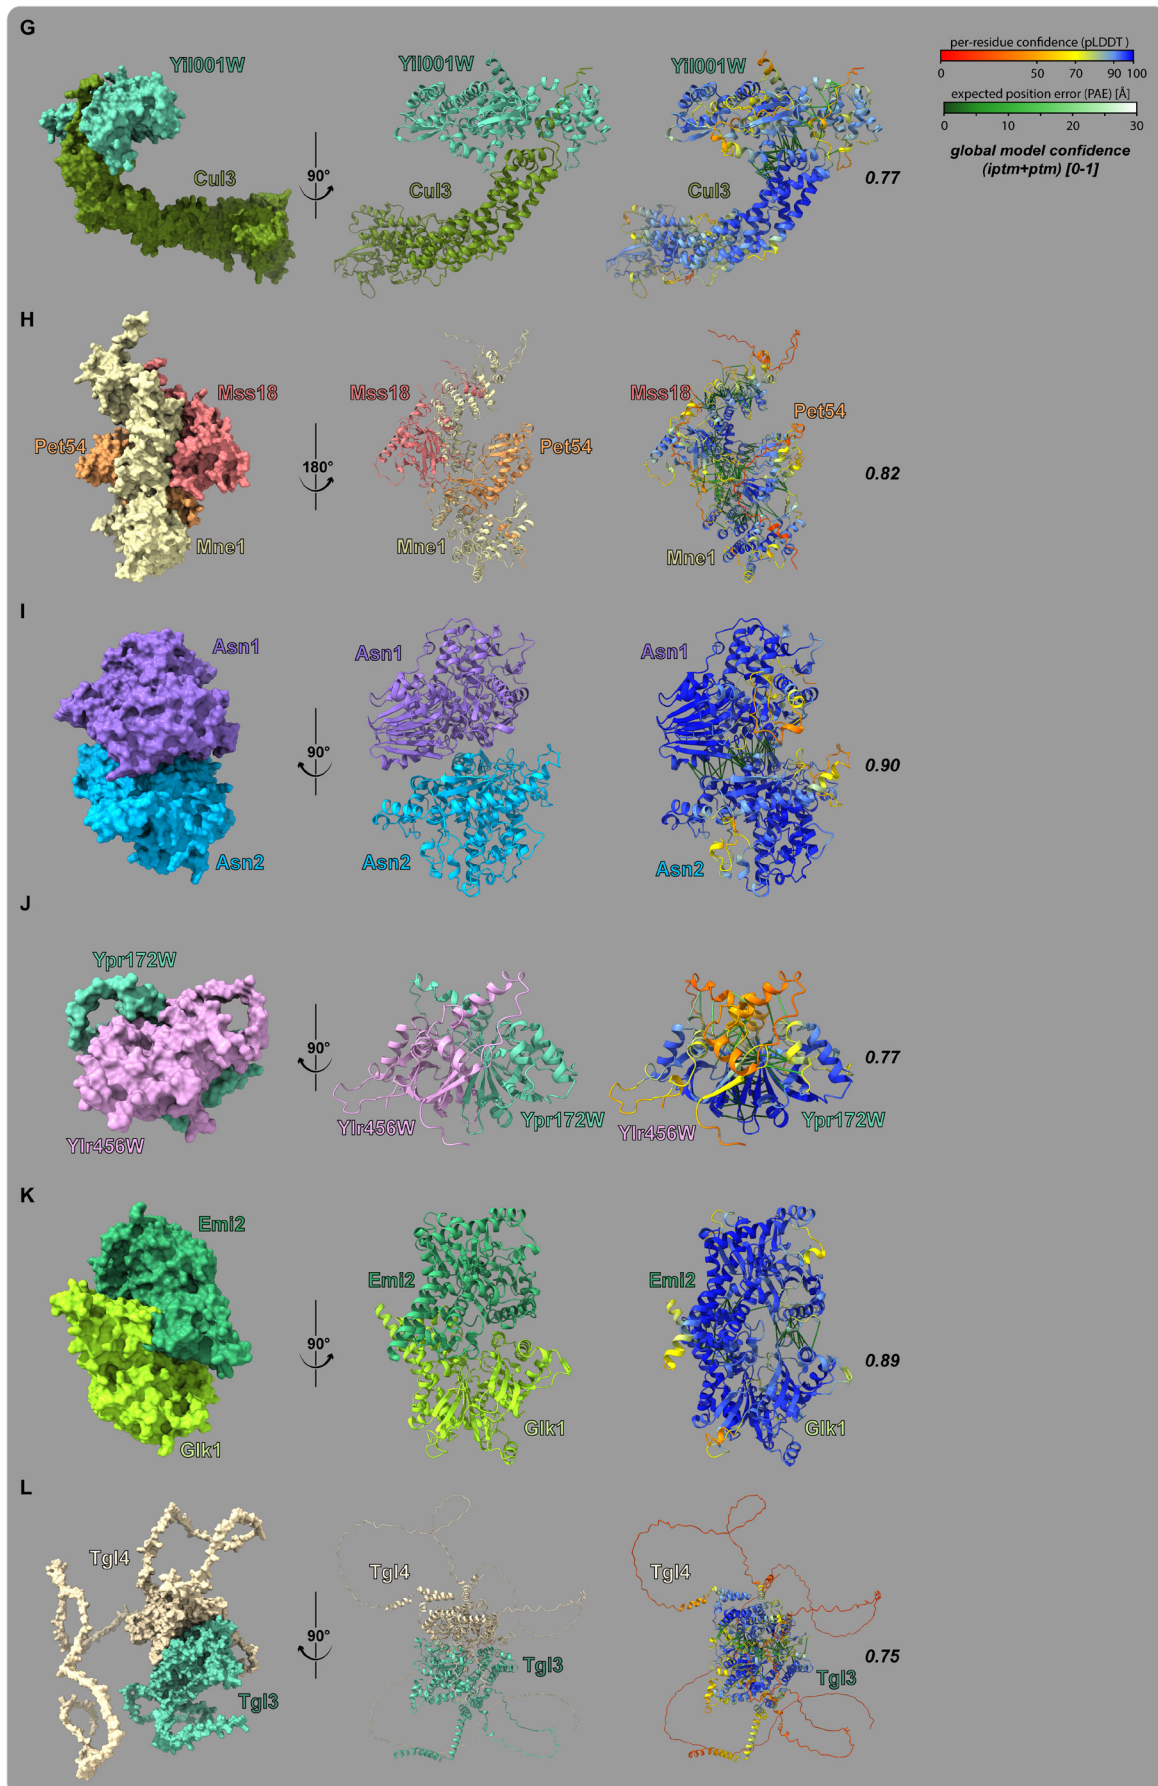

Supplementary Information Figure 4 (part 2/4) | Continuation of supplementary figure 4.

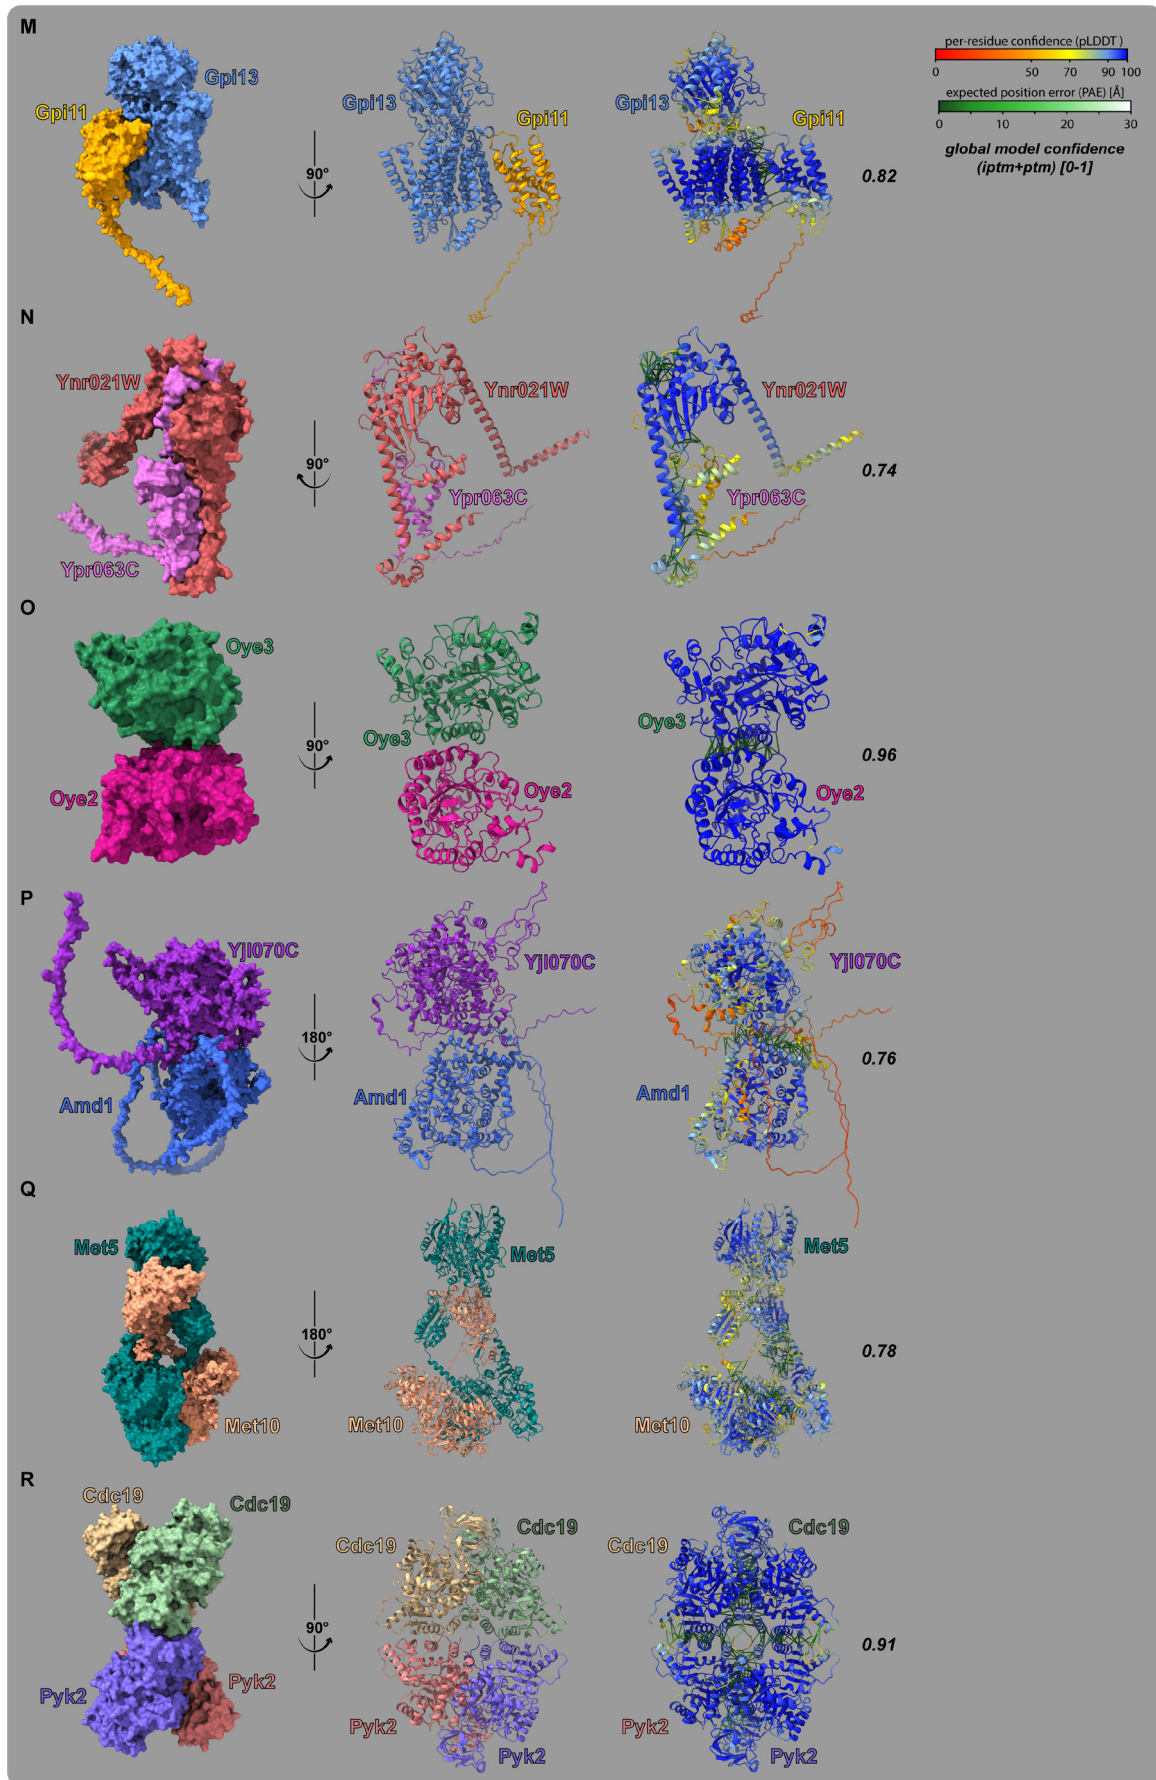

Supplementary Information Figure 4 (part 3/4) | Continuation of supplementary figure 4.

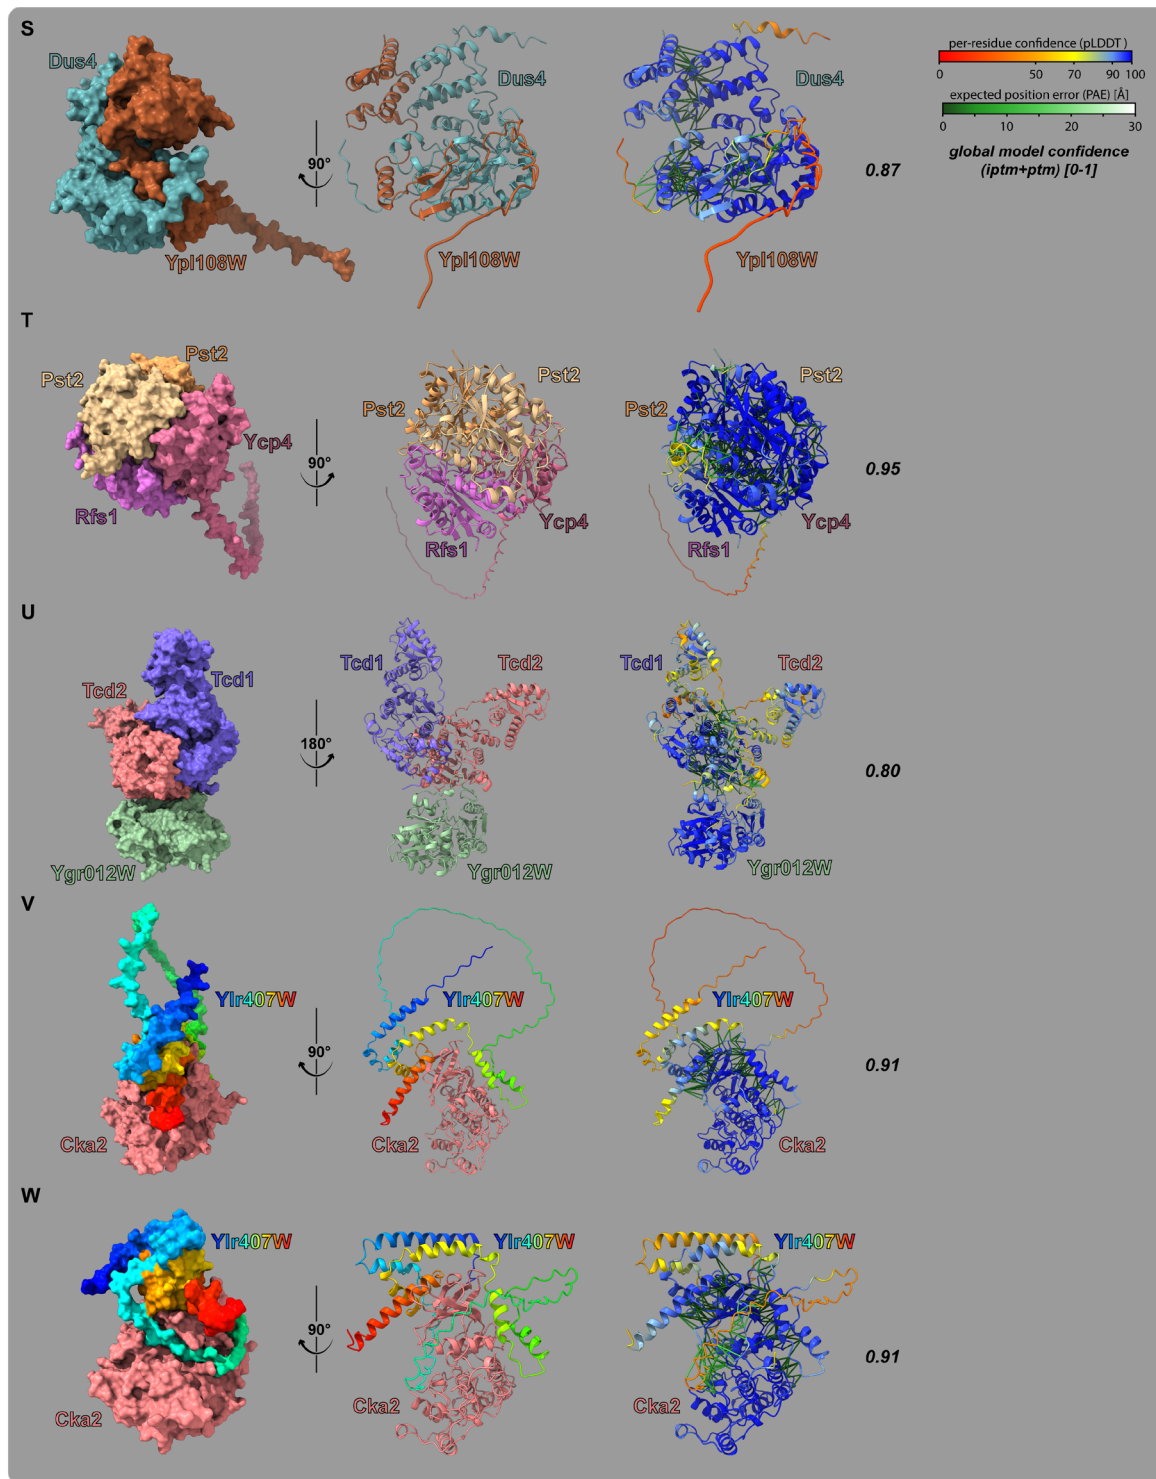

Supplementary Information Figure 4 (part 4/4) | Continuation of supplementary figure 4.
